# Supplementary material
Source: PubMed Central journal article supplement (PMC3540841)
Supplement: supp_P025577_jlr.P025577-1.pdf [file supp_P025577_jlr.P025577-1.pdf]

## SUPPLEMENTAL INFORMATION

Basal omega-3 fatty acid status affects fatty acid and oxylipin responses to high-dose n3-HUFA  
in healthy volunteers

Alison H. Keenan<sup>1</sup>, Theresa L. Pedersen<sup>2</sup>, Kristi Fillaus<sup>3</sup>, Mark K. Larson<sup>4</sup>, Gregory C. Shearer<sup>3,5</sup>,  
John W. Newman<sup>1,2</sup>

(1) Department of Nutrition, University of California, Davis, CA, 95616; (2) USDA, ARS, Western Human Nutrition Research Center, Davis, CA, 95616; (3) Cardiovascular Health Research Center, Sanford Research/USD, Sioux Falls, SD, 57117; (4) Department of Biology, Augustana College, Sioux Falls, SD, 57197; (5) Basic Biomedical Science & Internal Medicine, Sanford School of Medicine, University of South Dakota, 57069

## SUPPLEMENTAL METHODS

### Oxylipin nomenclature

The International Union of Pure and Applied Chemistry (IUPAC) has adopted abbreviations for oxidized fatty acids following the recommendations of Smith *et al.*<sup>1,2</sup>. Briefly, compounds are named using position, number, and standardized abbreviations of functional groups, carbon chain length, and degree of unsaturation. Plural chemical moieties are listed as Di (two), Tr (three), T (four), P (five), He (six). Abbreviations of chemical moieties are: Ep – Epoxide; H – hydroxy; Hp – hydroperoxide; K – keto. Carbon numbers appearing in this report

are abbreviated O (octadeca *i.e.* 18), E (eicosa *i.e.* twenty) and Do (docosa *i.e.* 22). Therefore, 14(15)-epoxyeicostri-(5Z,8Z,11Z)-enoic acid is reduced to 14(15)-EpETrE while 9(10)-epoxyoctadec-(12Z)-enoic acid becomes 9(10)-EpOME. Dihydroxy lipids are named similarly, such that 14,15-dihydroxyeicostri-(5Z,8Z,11Z)-enoic acid becomes 14,15-DiHETrE, while 20-hydroxyeicosatetra-(5Z,8Z,11Z,14Z)-enoic acid is 20-HETE.

1. Smith DL, Willis AL. A suggested shorthand nomenclature for the eicosanoids. *Lipids*. 1987;22:983-986.
2. Smith WL, Borgeat P, Hamberg M, Roberts LJ, 2nd, Willis A, Yamamoto S, Ramwell PW, Rokach J, Samuelsson B, Corey EJ, et al. Nomenclature. *Methods Enzymol*. 1990;187:1-9.

**Table S1: Oxylipin Internal Standards**

| Compound                   | CID Mass Transition (Da) | Internal Standard |
|----------------------------|--------------------------|-------------------|
| <b>Internal Standards</b>  |                          |                   |
| CUDA                       | 340.3 > 214.1            |                   |
| PHAU                       | 249.2 > 130.1            |                   |
| <b>Surrogate Standards</b> |                          |                   |
| d4 6-keto-PGF1 $\alpha$    | 373.3 > 167.1            | PHAU              |
| d4-TXB2                    | 373.3 > 173.15           | PHAU              |
| d4-PGE2                    | 355.3 > 275.2            | PHAU              |
| d4-PGD2                    | 355.3 > 275.2            | PHAU              |
| d3-LTE4                    | 441.4 > 336.3            | CUDA              |
| d4-LTB4                    | 339.3 > 163.15           | CUDA              |
| d6-20-HETE                 | 325.3 > 281.15           | CUDA              |
| d4-9(S)-HODE               | 299.3 > 172.1            | CUDA              |
| d8-12(S)-HETE              | 327.2 > 184.15           | CUDA              |
| d8-5(S)-HETE               | 327.2 > 116.1            | CUDA              |
| d8-11(12)-EpETrE           | 327.2 > 171.15           | CUDA              |

**Table S2: Eighteen Carbon Oxylipins**

| Compound                                | CID Mass Transition (Da) | Surrogate Standard      |
|-----------------------------------------|--------------------------|-------------------------|
| <b>Linoleic Acid Metabolites</b>        |                          |                         |
| 9,12,13-TriHOME                         | 329.2 > 211.2            | d4 6-keto-PGF1 $\alpha$ |
| 9,10,13-TriHOME                         | 329.2 > 171.1            | d4 6-keto-PGF1 $\alpha$ |
| 12,13-DHOME                             | 313.2 > 183.1            | d4-9(S)-HODE            |
| 9,10-DHOME                              | 313.2 > 201.1            | d4-9(S)-HODE            |
| 13-HODE                                 | 295.2 > 195.2            | d4-9(S)-HODE            |
| 9-HODE                                  | 295.2 > 171.1            | d4-9(S)-HODE            |
| 13-KODE                                 | 293.2 > 195.2            | d4-9(S)-HODE            |
| 9-KODE                                  | 293.2 > 185.1            | d4-9(S)-HODE            |
| 12(13)-EpOME                            | 295.2 > 195.1            | d8-11(12)-EpETrE        |
| 9(10)-EpOME                             | 295.2 > 171.1            | d8-11(12)-EpETrE        |
| <b>alpha Linolenic Acid Metabolites</b> |                          |                         |
| 15,16-DiHODE                            | 311.2 > 235.15           | d4-9(S)-HODE            |
| 12,13-DiHODE                            | 311.2 > 183.1            | d4-9(S)-HODE            |
| 9,10-DiHODE                             | 311.2 > 201.15           | d4-9(S)-HODE            |
| 9-HOTE                                  | 293.35 > 171.15          | d4-9(S)-HODE            |
| 13-HOTE                                 | 293.35 > 195.15          | d4-9(S)-HODE            |
| 15(16)-EpODE                            | 293.2 > 275.15           | d8-11(12)-EpETrE        |
| 9(10)-EpODE                             | 293.2 > 275.15           | d8-11(12)-EpETrE        |
| 12(13)-EpODE                            | 293.2 > 183.1            | d8-11(12)-EpETrE        |

**Table S3: Twenty Carbon Oxylipins**

| Compound                                      | CID Mass Transition (Da) | Internal Standard       |
|-----------------------------------------------|--------------------------|-------------------------|
| <b>dihomo gamma Linoleic Acid Metabolites</b> |                          |                         |
| 15(S)-HETrE                                   | 321.2 > 221.15           | d8-11(12)-EpETrE        |
| <b>Arachidonic Acid Metabolites</b>           |                          |                         |
| 6-keto-PGF1 $\alpha$                          | 369.2 > 163.1            | d4 6-keto-PGF1 $\alpha$ |
| TXB2                                          | 369.3 > 195.2            | d4 6-keto-PGF1 $\alpha$ |
| PGF2 $\alpha$ / F2-isoprostanes               | 353.2 > 193.1            | d4 6-keto-PGF1 $\alpha$ |
| 20-carboxy-LTB4                               | 365.2 > 347.2            | d4 6-keto-PGF1 $\alpha$ |
| 20-hydroxy-LTB4                               | 351.2 > 195.15           | d4 6-keto-PGF1 $\alpha$ |
| 11,12,15 THET                                 | 353.2 > 167.15           | d4 6-keto-PGF1 $\alpha$ |
| Lipoxin A4                                    | 351.3 > 217.15           | d4 6-keto-PGF1 $\alpha$ |
| 8,15-DiHETE                                   | 335.3 > 235.15           | d4-9(S)-HODE            |
| 5,15-DiHETE                                   | 335.3 > 173.15           | d4-9(S)-HODE            |
| LTB4                                          | 335.2 > 195.15           | d4-LTB4                 |
| 14,15-DHET                                    | 337.2 > 207.1            | d4-9(S)-HODE            |
| 11,12-DHET                                    | 337.2 > 167.1            | d4-9(S)-HODE            |
| 8,9-DHET                                      | 337.2 > 127.1            | d4-9(S)-HODE            |
| 5,6-DHET                                      | 337.2 > 145.1            | d4-9(S)-HODE            |
| 20-HETE                                       | 319.2 > 275.2            | d4-9(S)-HODE            |
| 19-HETE                                       | 319.2 > 275.2            | d4-9(S)-HODE            |
| 15-HETE                                       | 319.2 > 219.1            | d4-9(S)-HODE            |
| 11-HETE                                       | 319.2 > 167.1            | d4-9(S)-HODE            |
| 12-HETE                                       | 319.2 > 179.1            | d4-9(S)-HODE            |
| 9-HETE                                        | 319.2 > 123.1            | d4-9(S)-HODE            |
| 8-HETE                                        | 319.2 > 155.1            | d4-9(S)-HODE            |
| 5-HETE                                        | 319.2 > 115.1            | d8-5(S)-HETE            |
| 15-KETE                                       | 317.3 > 273.2            | d8-11(12)-EpETrE        |
| 5-KETE                                        | 317.2 > 203.15           | d8-11(12)-EpETrE        |
| 14(15)-EET                                    | 319.2 > 219.1            | d8-11(12)-EpETrE        |
| 11(12)-EET                                    | 319.2 > 208.1            | d8-11(12)-EpETrE        |
| 8(9)-EET                                      | 319.2 > 155.1            | d8-11(12)-EpETrE        |
| 5(6)-EET                                      | 319.2 > 191.1            | d8-11(12)-EpETrE        |
| <b>Eicosapentaenoic Acid Metabolites</b>      |                          |                         |
| Resolvin E1                                   | 349.3 > 195              | d4 6-keto-PGF1 $\alpha$ |
| 17,18-DiHETE                                  | 335.3 > 247.2            | d4-9(S)-HODE            |
| 14,15-DiHETE                                  | 335.3 > 207.15           | d4-9(S)-HODE            |
| 15(S)-HEPE                                    | 317.2 > 219.15           | d4-9(S)-HODE            |
| 12(S)-HEPE                                    | 317.3 > 179.2            | d4-9(S)-HODE            |
| 5(S)-HEPE                                     | 317.3 > 115.2            | d4-9(S)-HODE            |
| 17(18)-EpETE                                  | 317.2 > 259.5            | d8-11(12)-EpETrE        |
| 14(15)-EpETE                                  | 317.2 > 247.5            | d8-11(12)-EpETrE        |

**Table S4: Twenty-two Carbon Oxylipins**

| Compound                                 | CID Mass Transition (Da) | Internal Standard       |
|------------------------------------------|--------------------------|-------------------------|
| <b>Docosapentaenoic Acid Metabolites</b> |                          |                         |
| Resolvin D1                              | 375.3 > 121.0            | d4 6-keto-PGF1 $\alpha$ |
| 19,20-DiHDPE                             | 361.5 > 273.5            | d4-9(S)-HODE            |
| 17(R)-HDoHE                              | 343.2 > 281.2            | d8-11(12)-EpETrE        |
| 19(20)-EpDPE                             | 343.5 > 281.2            | d8-11(12)-EpETrE        |
| 16(17)-EpDPE                             | 343.5 > 273.5            | d8-11(12)-EpETrE        |

**Table S5: Oxylipin assay UPLC solvent gradient**

| Time (min) | Solvent A (%) |
|------------|---------------|
| 0.0        | 75            |
| 1.0        | 60            |
| 2.5        | 58            |
| 4.5        | 50            |
| 10.5       | 35            |
| 12.5       | 25            |
| 14.0       | 15            |
| 14.5       | 5             |
| 15.0       | 75            |
| 16.0       | 75            |

Solvent A = 0.1% acetic acid

Solvent B = 90:10 v/v acetonitrile/isopropanol

**Table S6: Oxylipin Surrogate Recoveries**

| Analytical Surrogates | Recoveries (Mean $\pm$ SD) |
|-----------------------|----------------------------|
| d4 6-keto PGF1a       | 58% $\pm$ 15%              |
| d4-TXB2 <sup>a</sup>  | 1% $\pm$ 1%                |
| d4-PGE2 <sup>a</sup>  | 0% $\pm$ 0%                |
| d4-PGD2 <sup>a</sup>  | 2% $\pm$ 2%                |
| d3-LTE4 <sup>a</sup>  | 0% $\pm$ 0%                |
| d4-LTB4               | 75% $\pm$ 13%              |
| 10,11-DHHep           | 87% $\pm$ 10%              |
| d11-14,15-DiHETrE     | 90% $\pm$ 7%               |
| d6-20-HETE            | 47% $\pm$ 6%               |
| d4-9(S)-HODE          | 71% $\pm$ 9%               |
| d8-12(S)-HETE         | 64% $\pm$ 8%               |
| d8-5(S)-HETE          | 59% $\pm$ 15%              |
| d8-11(12)-EpETrE      | 60% $\pm$ 15%              |

<sup>a</sup> – These surrogates and their associated analytical targets are not alkali stable.

SUPPLEMENTAL RESULTS

**Table S7: Fatty acid mol% composition in platelet, RBC, and plasma samples pre- and post- P-OM3 treatment <sup>a</sup>**

|                                       | Platelet  |            |          | RBC        |            |          | Plasma    |           |          |
|---------------------------------------|-----------|------------|----------|------------|------------|----------|-----------|-----------|----------|
|                                       | Week 0    | Week 4     | <i>p</i> | Week 0     | Week 4     | <i>p</i> | Week 0    | Week 4    | <i>p</i> |
| <i>Saturated Fatty Acids</i>          |           |            |          |            |            |          |           |           |          |
| 14:0                                  | 0.39±0.03 | 0.34±0.02  |          | 0.3 ± 0.02 | 0.3 ± 0.02 |          | 0.7±0.04  | 0.7±0.05  |          |
| 16:0                                  | 18±0.40   | 19±0.50    |          | 21±0.30    | 21±0.30    |          | 22±0.40   | 21±0.30   |          |
| 18:0                                  | 21±0.30   | 20±0.40    |          | 18±0.20    | 18±0.20    |          | 9.4±0.20  | 9.3±0.30  |          |
| <i>Mono Unsaturated Fatty Acids</i>   |           |            |          |            |            |          |           |           |          |
| 16:1n7                                | 2.7±0.50  | 2.7±0.50   |          | 0.23±0.02  | 0.17±0.02  | **       | 1.2±0.09  | 0.94±0.06 | ***      |
| 16:1n7t                               | 0.5±0.09  | 0.33±0.07  |          | 0.12±0.01  | 0.11±0.01  |          | 0.24±0.01 | 0.22±0.01 |          |
| 18:1n9                                | 14±0.20   | 14±0.40    |          | 13±0.10    | 13±0.10    | **       | 16±0.30   | 15±0.30   | ***      |
| 18:1t                                 | 1.2±0.07  | 1.1±0.07   |          | 2.3±0.20   | 2.2±0.20   |          | 1±0.06    | 1±0.08    |          |
| 20:1n9                                | 0.57±0.03 | 0.66±0.10  |          | 0.27±0.01  | 0.29±0.01  |          | 0.24±0.01 | 0.24±0.01 |          |
| <i>Poly Unsaturated Fatty Acids</i>   |           |            |          |            |            |          |           |           |          |
| 18:2n6                                | 7.8±0.40  | 8.2±0.50   |          | 13±0.20    | 12±0.20    | ***      | 30±0.60   | 29±0.60   |          |
| 18:3n6                                | 0.07±0.01 | 0.058±0.01 |          | 0.1±0.01   | 0.09±0.01  | **       | 0.43±0.03 | 0.28±0.03 | ***      |
| 18:3n3                                | 0.12±0.01 | 0.15±0.02  |          | 0.14±0.01  | 0.13±0.01  | *        | 0.67±0.05 | 0.66±0.07 |          |
| 20:2n6                                | 0.42±0.02 | 0.46±0.08  |          | 0.32±0.01  | 0.31±0.01  |          | 0.39±0.02 | 0.33±0.03 |          |
| 20:3n6                                | 1.5±0.08  | 1.3±0.06   | *        | 1.8±0.08   | 1.4±0.06   | *        | 2.4±0.10  | 1.6±0.07  | ***      |
| <i>Highly Unsaturated Fatty Acids</i> |           |            |          |            |            |          |           |           |          |
| 20:4n6                                | 23±0.40   | 21±0.60    | *        | 18±0.20    | 16±0.20    | ***      | 10±0.30   | 8.1±0.20  | ***      |
| 22:4n6                                | 3.0±0.10  | 1.9±0.10   | **       | 4.2±0.10   | 3.8±0.10   | ***      | 0.45±0.02 | 0.22±0.01 | ***      |
| 22:5n6                                | 0.41±0.02 | 0.2±0.01   | ***      | 0.86±0.03  | 0.71±0.02  | ***      | 0.35±0.02 | 0.14±0.01 | ***      |
| 20:5n3                                | 0.32±0.08 | 1.8±0.10   | ***      | 0.37±0.05  | 1.8±0.08   | ***      | 0.53±0.08 | 3.5±0.20  | ***      |
| 22:5n3                                | 1.7±0.08  | 2.3±0.08   | ***      | 2.3±0.10   | 2.8±0.08   | ***      | 0.73±0.06 | 1.1±0.05  | ***      |
| 22:6n3                                | 1.8±0.10  | 3.1±0.20   | ***      | 3.6±0.20   | 5.1±0.20   | ***      | 2.1±0.10  | 5±0.20    | ***      |

<sup>a</sup> - Results are means ± SEMs. Significance of means tested by 2-tailed t-test after false discovery rate corrections (q=0.2) for multiple comparisons are indicated at p<0.05 (\*), p<0.01 (\*\*), and p<0.001 (\*\*\*).

**Table S8: Total plasma eicosanoid and docosanoid oxylipins concentrations (nM)**

| Oxylipin                     | Class   | Pre (Mean $\pm$ SEM) | Post (Mean $\pm$ SEM) | $p^a$  |
|------------------------------|---------|----------------------|-----------------------|--------|
| <b>20:3n6 Metabolite</b>     |         |                      |                       |        |
| 15-HETrE                     | Alcohol | 52 $\pm$ 5.2         | 32 $\pm$ 2.5          | <0.001 |
| <b>20:4n6 Metabolites</b>    |         |                      |                       |        |
| F2-isoprostanes <sup>b</sup> | Triol   | 2.84 $\pm$ 0.37      | 2.31 $\pm$ 0.24       | -      |
| 11,12,15 THET                | Triol   | 5.25 $\pm$ 0.67      | 4.44 $\pm$ 0.66       | -      |
| 8,15-DiHETE                  | Diol    | 1.08 $\pm$ 0.23      | 0.733 $\pm$ 0.096     | -      |
| 5,15-DiHETE                  | Diol    | 0.175 $\pm$ 0.016    | 0.151 $\pm$ 0.013     | -      |
| 14,15-DiHETrE                | Diol    | 2.13 $\pm$ 0.32      | 2.02 $\pm$ 0.3        | -      |
| 11,12-DiHETrE                | Diol    | 1.61 $\pm$ 0.13      | 1.38 $\pm$ 0.11       | -      |
| 8,9-DiHETrE                  | Diol    | 4.25 $\pm$ 0.24      | 3.4 $\pm$ 0.15        | <0.001 |
| 5,6-DiHETrE                  | Diol    | 15.8 $\pm$ 1.4       | 13.2 $\pm$ 1          | 0.092  |
| 14(15)-EpETrE                | Epoxide | 17 $\pm$ 3.7         | 13.8 $\pm$ 2.5        | -      |
| 11(12)-EpETrE                | Epoxide | 24.3 $\pm$ 5.5       | 19.1 $\pm$ 3.7        | -      |
| 8(9)-EpETrE                  | Epoxide | 9.25 $\pm$ 2.1       | 7.72 $\pm$ 1.6        | -      |
| 15-HETE                      | Alcohol | 168 $\pm$ 14         | 135 $\pm$ 9           | <0.05  |
| 12-HETE                      | Alcohol | 99 $\pm$ 14          | 74.6 $\pm$ 5.2        | -      |
| 11-HETE                      | Alcohol | 113 $\pm$ 12         | 93.3 $\pm$ 9.3        | 0.062  |
| 9-HETE                       | Alcohol | 85.5 $\pm$ 12        | 61.8 $\pm$ 3.9        | <0.05  |
| 8-HETE                       | Alcohol | 118 $\pm$ 21         | 81.1 $\pm$ 8.2        | <0.05  |
| 5-HETE                       | Alcohol | 148 $\pm$ 15         | 116 $\pm$ 7.5         | 0.087  |
| 15-KETE                      | Ketone  | 416 $\pm$ 47         | 349 $\pm$ 28          | -      |
| 12-KETE                      | Ketone  | 616 $\pm$ 43         | 538 $\pm$ 28          | -      |
| 5-KETE                       | Ketone  | 101 $\pm$ 12         | 74.6 $\pm$ 6.9        | -      |
| <b>20:5n3 Metabolites</b>    |         |                      |                       |        |
| Resolvin E1                  | Triol   | < 0.1                | < 0.1                 |        |
| 17,18-DiHETE                 | Diol    | 6.96 $\pm$ 1.1       | 14 $\pm$ 2.5          | <0.05  |
| 14,15-DiHETE                 | Diol    | 31 $\pm$ 1.8         | 33.3 $\pm$ 2.1        | -      |
| 17(18)-EpETE                 | Epoxide | 0.715 $\pm$ 0.18     | 5.08 $\pm$ 1.1        | <0.001 |
| 14(15)-EpETE                 | Epoxide | 0.411 $\pm$ 0.18     | 4.04 $\pm$ 0.94       | <0.001 |
| 15-HEPE                      | Alcohol | 2.75 $\pm$ 0.46      | 16.8 $\pm$ 1.3        | <0.001 |
| 12-HEPE                      | Alcohol | 6.45 $\pm$ 1.1       | 36.5 $\pm$ 3.3        | <0.001 |
| 5-HEPE                       | Alcohol | 8.51 $\pm$ 1.6       | 47.3 $\pm$ 4          | <0.001 |
| <b>22:6n3 Metabolites</b>    |         |                      |                       |        |
| Resolvin D1                  | Triol   | 0.524 $\pm$ 0.04     | 0.658 $\pm$ 0.064     | 0.097  |
| 19,20-DiHDPA                 | Diol    | 0.479 $\pm$ 0.051    | 1.17 $\pm$ 0.17       | <0.001 |
| 19(20)-EpDPE                 | Epoxide | 3.68 $\pm$ 1.2       | 8.64 $\pm$ 2          | <0.05  |
| 16(17)-EpDPE                 | Epoxide | 3.45 $\pm$ 0.85      | 6.79 $\pm$ 1.2        | <0.05  |
| 17-HDoHE                     | Alcohol | 39.3 $\pm$ 3.6       | 94 $\pm$ 7            | <0.001 |

$a$  – Mean differences were assessed by paired 2-tailed t-tests after normality transformation,  $p > 0.1$  not shown (-).

$b$  – The F2 isoprostanes were quantified as an unresolved mixture of peaks sharing the PGF2 $\alpha$  mass transition ( $m/z$  353.2  $>$  193.1) as shown in Figure S2.

**Table S9: Total plasma octadecanoid oxylipin concentrations (nM)**

| Oxylipin                  | Class        | Pre (Mean ± SD) | Post (Mean ± SD) | <i>p</i> <sup>α</sup> |
|---------------------------|--------------|-----------------|------------------|-----------------------|
| <b>18:2n6 Metabolites</b> |              |                 |                  |                       |
| 9,10-13-TriHOME           | Triol        | 14.1 ± 2.1      | 14.4 ± 1.7       | -                     |
| 9,12,13-TriHOME           | Triol        | 10.5 ± 1.5      | 10.3 ± 1.3       | -                     |
| 12,13-DiHOME              | Diol         | 8.26 ± 0.78     | 8.93 ± 1.1       | -                     |
| 9,10-DiHOME               | Diol         | 129 ± 11        | 132 ± 11         | -                     |
| 13-HODE                   | Alcohol      | 1160 ± 100      | 996 ± 71         | -                     |
| 9-HODE                    | Alcohol      | 833 ± 69        | 729 ± 51         | -                     |
| 13-KODE                   | Ketone       | 2110 ± 150      | 2010 ± 120       | -                     |
| 9-KODE                    | Ketone       | 434 ± 39        | 400 ± 30         | -                     |
| 12(13)Ep-9-KODE           | Epoxy Ketone | 124 ± 13        | 110 ± 10         | -                     |
| 12(13)-EpOME              | Epoxide      | 45.6 ± 9.8      | 41.1 ± 8.4       | -                     |
| 9(10)-EpOME               | Epoxide      | 49.4 ± 11       | 44.7 ± 9.2       | -                     |
| <b>18:3n3 Metabolites</b> |              |                 |                  |                       |
| 15,16-DiHODE              | Diol         | 6.24 ± 0.71     | 4.81 ± 0.9       | -                     |
| 9,10-DiHODE               | Diol         | 0.902 ± 0.1     | 0.945 ± 0.1      | -                     |
| 13-HOTE                   | Alcohol      | 8.42 ± 1.3      | 6.93 ± 0.61      | -                     |
| 9-HOTE                    | Alcohol      | 16 ± 1.6        | 14.6 ± 1.1       | -                     |
| 15(16)-EpODE              | Epoxide      | 5.6 ± 1.6       | 4.46 ± 1.1       | -                     |
| 12(13)-EpODE              | Epoxide      | 0.478 ± 0.11    | 0.41 ± 0.078     | -                     |
| 9(10)-EpODE               | Epoxide      | 6.08 ± 1.4      | 4.87 ± 0.98      | -                     |

α – Mean differences were assessed by paired 2-tailed t-tests after normality transformation, *p* > 0.1 not shown (-).



**Table S10: Treatment dependent change in subject plasma fatty acids.**

| Compound | Class   | % Above Threshold | $p$<br>( $\chi^2$ ) <sup>a</sup> | $p$<br>(t-test) <sup>b</sup> |
|----------|---------|-------------------|----------------------------------|------------------------------|
| 22:6n3   | n3-HUFA | 100%              | <0.001                           | <0.001                       |
| 20:5n3   | n3-HUFA | 97%               | <0.001                           | <0.001                       |
| 22:5n3   | n3-HUFA | 77%               | 0.04                             | 0.005                        |
| 24:1n9   | MUFA    | 60%               | -                                | -                            |
| 24:0     | SFA     | 57%               | -                                | -                            |
| 18:0     | SFA     | 53%               | -                                | -                            |
| 14:0     | SFA     | 50%               | -                                | -                            |
| 16:0     | SFA     | 50%               | -                                | -                            |
| 16:1n7t  | MUFA    | 50%               | -                                | -                            |
| 18:1n9t  | MUFA    | 47%               | -                                | -                            |
| 18:1n9   | MUFA    | 47%               | -                                | -                            |
| 20:1n9   | MUFA    | 47%               | -                                | -                            |
| 16:1n7   | MUFA    | 47%               | -                                | -                            |
| 20:2n6   | n6-PUFA | 43%               | -                                | -                            |
| 18:3n3   | n3-PUFA | 43%               | -                                | -                            |
| 18:2n6tc | n6-PUFA | 43%               | -                                | -                            |
| 18:2n6ct | n6-PUFA | 40%               | -                                | -                            |
| 18:2n6   | n6-PUFA | 40%               | -                                | -                            |
| 18:2n6tt | n6-PUFA | 33%               | 0.2                              | -                            |
| 18:3n6   | n6-PUFA | 33%               | 0.2                              | -                            |
| 20:4n6   | n6-HUFA | 33%               | 0.2                              | -                            |
| 20:3n6   | n6-PUFA | 30%               | 0.1                              | 0.09                         |
| 22:4n6   | n6-HUFA | 13%               | 0.005                            | <0.001                       |
| 22:5n6   | n6-HUFA | 10%               | 0.002                            | <0.001                       |

*a* - Observed population distribution above and below the change threshold was compared to the expected  $H_0$  of 50:50 using a  $\chi^2$  test with 1 df.

*b* - Differences in analyte means before and after treatment were tested with paired 2-tailed t-tests.

**Table S11: Treatment dependent changes in plasma fatty acid alcohol and ketones.**

| Compound | Parent FA | Chemical Class  | % Above Threshold | $p$ ( $\chi^2$ ) <sup>a</sup> | $p$ (t-test) <sup>b</sup> |
|----------|-----------|-----------------|-------------------|-------------------------------|---------------------------|
| 5-HEPE   | 20:5n3    | n3-HUFA Alcohol | 100%              | <0.001                        | <0.001                    |
| 17-HDoHE | 22:6n3    | n3-HUFA Alcohol | 100%              | <0.001                        | <0.001                    |
| 15-HEPE  | 20:5n3    | n3-HUFA Alcohol | 97%               | <0.001                        | <0.001                    |
| 12-HEPE  | 20:5n3    | n3-HUFA Alcohol | 97%               | <0.001                        | <0.001                    |
| 13-KODE  | 18:2n6    | n6-PUFA Ketone  | 53%               | -                             | -                         |
| 9-HODE   | 18:2n6    | n6-PUFA Alcohol | 47%               | -                             | 0.2                       |
| 9-KODE   | 18:2n6    | n6-PUFA Ketone  | 47%               | -                             | -                         |
| 9-HOTE   | 18:3n3    | n3-PUFA Alcohol | 47%               | -                             | -                         |
| 15-KETE  | 20:4n6    | n6-HUFA Ketone  | 47%               | -                             | -                         |
| 12-KETE  | 20:4n6    | n6-HUFA Ketone  | 47%               | -                             | 0.1                       |
| 13-HODE  | 18:2n6    | n6-PUFA Alcohol | 43%               | -                             | 0.2                       |
| 13-HOTE  | 18:3n3    | n3-PUFA Alcohol | 40%               | -                             | -                         |
| 12-HETE  | 20:4n6    | n6-HUFA Alcohol | 37%               | 0.2                           | 0.1                       |
| 11-HETE  | 20:4n6    | n6-HUFA Alcohol | 37%               | 0.2                           | 0.06                      |
| 8-HETE   | 20:4n6    | n6-HUFA Alcohol | 37%               | 0.2                           | 0.06                      |
| 5-HETE   | 20:4n6    | n6-HUFA Alcohol | 37%               | 0.2                           | 0.09                      |
| 15-HETE  | 20:4n6    | n6-HUFA Alcohol | 33%               | 0.2                           | <0.05                     |
| 9-HETE   | 20:4n6    | n6-HUFA Alcohol | 30%               | 0.1                           | <0.05                     |
| 5-KETE   | 20:4n6    | n6-HUFA Ketone  | 27%               | 0.07                          | 0.11                      |
| 15-HETrE | 20:3n6    | n6-PUFA Alcohol | 23%               | 0.04                          | <0.001                    |

*a* - Observed population distribution above and below the change threshold was compared to the expected Ho of 50:50 using a  $\chi^2$  test with 1 df.

*b* - Differences in analyte means before and after treatment were tested with paired 2-tailed t-tests.

**Table S12: Treatment dependent changes in plasma fatty acid epoxide, diol, and triols.**

| Compound                     | Parent FA | Chemical Class  | % Above Threshold | $p$ ( $\chi^2$ ) <sup>a</sup> | $p$ (t-test) <sup>b</sup> |
|------------------------------|-----------|-----------------|-------------------|-------------------------------|---------------------------|
| 17(18)-EpETE                 | 20:5n3    | n3-HUFA Epoxide | 93%               | <0.001                        | <0.001                    |
| 14(15)-EpETE                 | 20:5n3    | n3-HUFA Epoxide | 93%               | <0.001                        | 0.03                      |
| 19,20-DiHDPA                 | 22:6n3    | n3-HUFA Diol    | 80%               | 0.02                          | <0.001                    |
| 17,18-DiHETE                 | 20:5n3    | n3-HUFA Diol    | 77%               | 0.04                          | 0.01                      |
| 16(17)-EpDPE                 | 22:6n3    | n3-HUFA Epoxide | 77%               | 0.04                          | <0.001                    |
| 19(20)-EpDPE                 | 22:6n3    | n3-HUFA Epoxide | 73%               | 0.07                          | 0.1                       |
| 9,10-13-TriHOME              | 18:2n6    | n6-PUFA Triol   | 67%               | 0.2                           | -                         |
| 12(13)-EpODE                 | 18:3n3    | n3-PUFA Epoxide | 60%               | -                             | -                         |
| 14,15-DiHETE                 | 20:5n3    | n3-HUFA Diol    | 60%               | -                             | -                         |
| 9(10)-EpOME                  | 18:2n6    | n6-PUFA Epoxide | 57%               | -                             | -                         |
| 9,12,13-TriHOME              | 18:2n6    | n6-PUFA Triol   | 57%               | -                             | -                         |
| 14(15)-EpETrE                | 20:4n6    | n6-HUFA Epoxide | 57%               | -                             | -                         |
| 12(13)-EpOME                 | 18:2n6    | n6-PUFA Epoxide | 53%               | -                             | -                         |
| 9,10-DiHOME                  | 18:2n6    | n6-PUFA Diol    | 53%               | -                             | -                         |
| 9(10)-EpODE                  | 18:3n3    | n3-PUFA Epoxide | 53%               | -                             | -                         |
| 15(16)-EpODE                 | 18:3n3    | n3-PUFA Epoxide | 53%               | -                             | -                         |
| 9,10-DiHODE                  | 18:3n3    | n3-PUFA Diol    | 53%               | -                             | -                         |
| LTB4                         | 20:4n6    | n6-HUFA Diol    | 53%               | -                             | -                         |
| 12,13-DiHOME                 | 18:2n6    | n6-PUFA Diol    | 50%               | -                             | -                         |
| 11(12)-EpETrE                | 20:4n6    | n6-PUFA Epoxide | 50%               | -                             | -                         |
| 8(9)-EpETrE                  | 20:4n6    | n6-PUFA Epoxide | 50%               | -                             | -                         |
| F2 isoprostanes <sup>c</sup> | 20:4n6    | n6-HUFA Triol   | 50%               | -                             | -                         |
| LTB5                         | 20:5n3    | n3-HUFA Diol    | 50%               | -                             | -                         |
| Resolvin D1                  | 22:6n3    | n3-HUFA Triol   | 50%               | -                             | 0.1                       |
| 14,15-DiHETrE                | 20:4n6    | n6-HUFA Diol    | 47%               | -                             | -                         |
| 8,15-DiHETE                  | 20:4n6    | n6-HUFA Diol    | 47%               | -                             | -                         |
| Lipoxin A4                   | 20:4n6    | n6-HUFA Diol    | 47%               | -                             | -                         |
| 12(13)-Ep-9-KODE             | 18:2n6    | n6-PUFA Epoxide | 43%               | -                             | -                         |
| 15,16-DiHODE                 | 18:3n3    | n3-PUFA Diol    | 40%               | -                             | 0.2                       |
| 11,12-DiHETrE                | 20:4n6    | n6-HUFA Diol    | 40%               | -                             | 0.1                       |
| 5,15-DiHETE                  | 20:4n6    | n6-HUFA Diol    | 40%               | -                             | -                         |
| 11,12,15-THET                | 20:4n6    | n6-HUFA Triol   | 40%               | -                             | -                         |
| 8,9-DiHETrE                  | 20:4n6    | n6-HUFA Diol    | 27%               | 0.07                          | 0.006                     |
| 5,6-DiHETrE                  | 20:4n6    | n6-HUFA Diol    | 27%               | 0.07                          | 0.1                       |

*a* - Observed population distribution above and below the change threshold was compared to the expected Ho of 50:50 using a  $\chi^2$  test with 1 df.

*b* - Differences in analyte means before and after treatment were tested with paired 2-tailed t-tests after normality transformation.  $p > 0.2$  not shown (-).

*c* - *b* - The F2 isoprostanes were quantified as an unresolved mixture of peaks sharing the PGF2 $\alpha$  mass transition ( $m/z$  353.2 > 193.1) as shown in Figure S2.

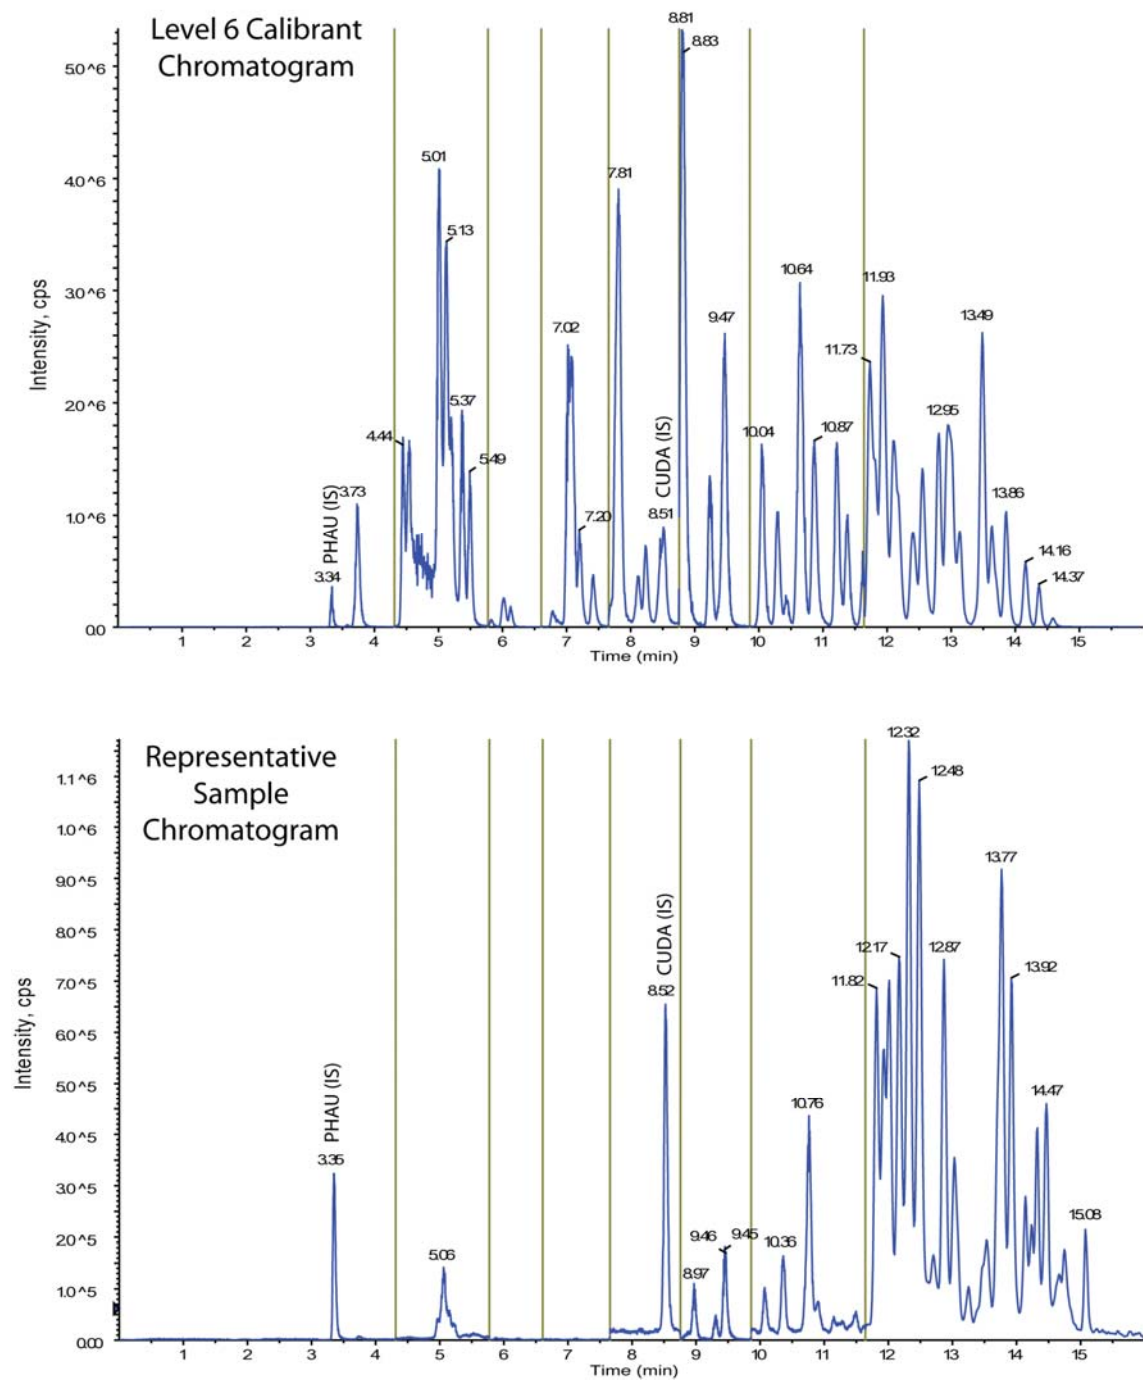

**Figure S1: Representative total ion current chromatograms of a high level oxylipin calibration solution (top) and plasma sample alkali releasable/stable oxylipins (bottom).** The internal standards (IS) 1-phenyl-3-hexanoic acid urea (PHAU) and 1-cyclohexyl-3dodecanoic acid urea (CUDA) are indicated in each trace. Vertical lines indicate multi-reaction monitoring window changes.

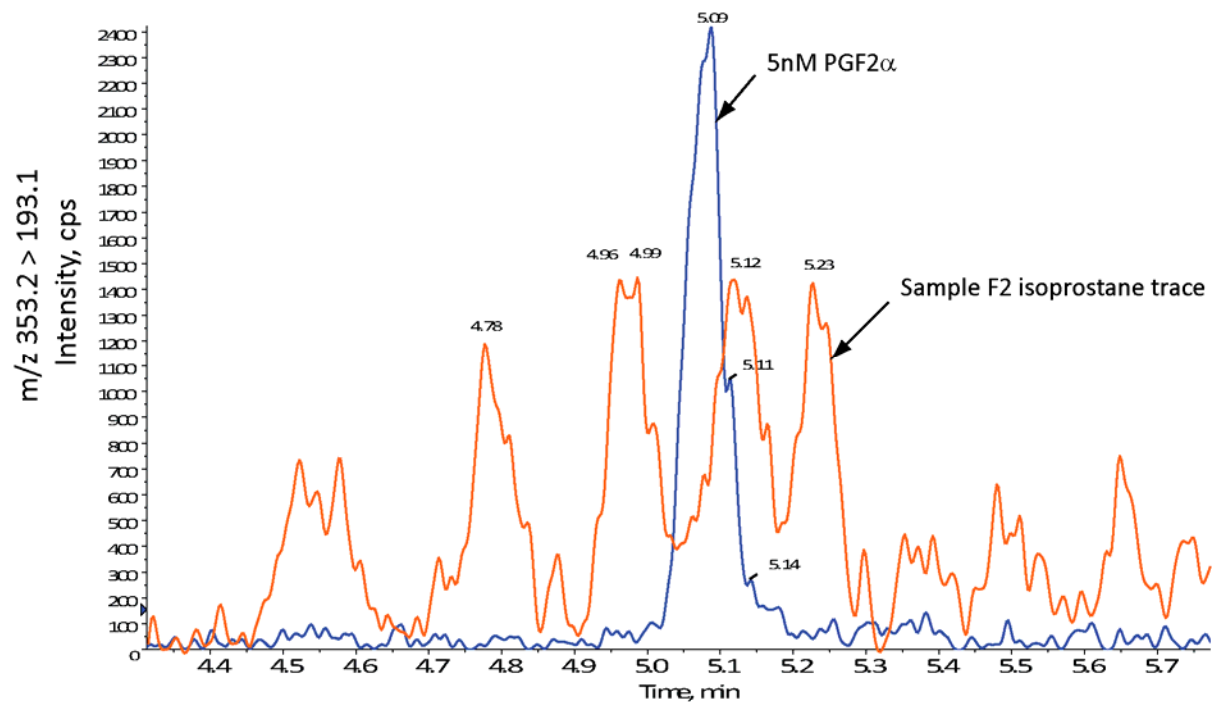

**Figure S2: Representative total ion current chromatograms of prostaglandin F2 $\alpha$  (PGF2 $\alpha$ ) mass transition for a low level oxylipin calibration solution (top) and an alkali digested plasma sample (bottom). The total area under the sample  $m/z$  353.2 > 193.1 ion trace was quantified using the PGF2 $\alpha$  calibration curve and used as an estimate of the total arachidonate derived F2 isoprostanes in the sample.**
